# Supplementary material for: Design and development of stapled transmembrane peptides that disrupt the activity of G-protein–coupled receptor oligomers
Source: PubMed Central journal article supplement (PMC6851324; doi:10.1074/jbc.ra119.009160), 2019-08-29
Supplement: supp_RA119.009160_152553_1_supp_385294_pwy89y.pdf [file supp_RA119.009160_152553_1_supp_385294_pwy89y.pdf]

## Supplementary Information

Design and development of stapled transmembrane peptides that disrupt the activity of G-protein coupled receptor oligomers

**Joaquín Botta<sup>1,2</sup>, Lucka Bibic<sup>2</sup>, Patrick Killoran<sup>3</sup>, Peter J. McCormick\*<sup>1</sup> and Lesley A. Howell\*<sup>4</sup>**

From the <sup>1</sup>Centre for Endocrinology, William Harvey Research Institute, Bart's and The London School of Medicine and Dentistry, Queen Mary University of London, Charterhouse Square, London, EC1M 6BQ; <sup>2</sup>School of Pharmacy, University of East Anglia, Norwich Research Park, Norwich, NR4 7TJ; <sup>3</sup>School of Pharmacy and Biomolecular Sciences, James Parsons Building, Byrom Street, Liverpool, L3 3AF; <sup>4</sup>School of Biological and Chemical Sciences, Queen Mary University of London, Mile End Road, London, E1 4NS

Running Title: *Stapled TM peptides modulate GPCR oligomers*

\* To whom correspondence should be addressed: Lesley A. Howell: School of Biological and Chemical Sciences, Queen Mary University of London, Mile End Road, London, E1 4NS; [l.howell@qmul.ac.uk](mailto:l.howell@qmul.ac.uk); Tel. (+44) 207 8826625 or Peter J. McCormick: Centre for Endocrinology, William Harvey Research Institute, Bart's and The London School of Medicine and Dentistry, Queen Mary University of London, Charterhouse Square, London, EC1M 6BQ; [p.mccormick@qmul.ac.uk](mailto:p.mccormick@qmul.ac.uk).

**Keywords:** G protein-coupled receptor (GPCR), cannabinoid receptor type 1 (CB<sub>1</sub>), dimerization cell-penetrating peptide (CPP), peptide chemical synthesis, serotonin receptor type 2A (5HT<sub>2A</sub>), NanoLuc binary technology (NanoBiT), hydrocarbon stapling, transmembrane peptide, bimolecular fluorescence complementation

---

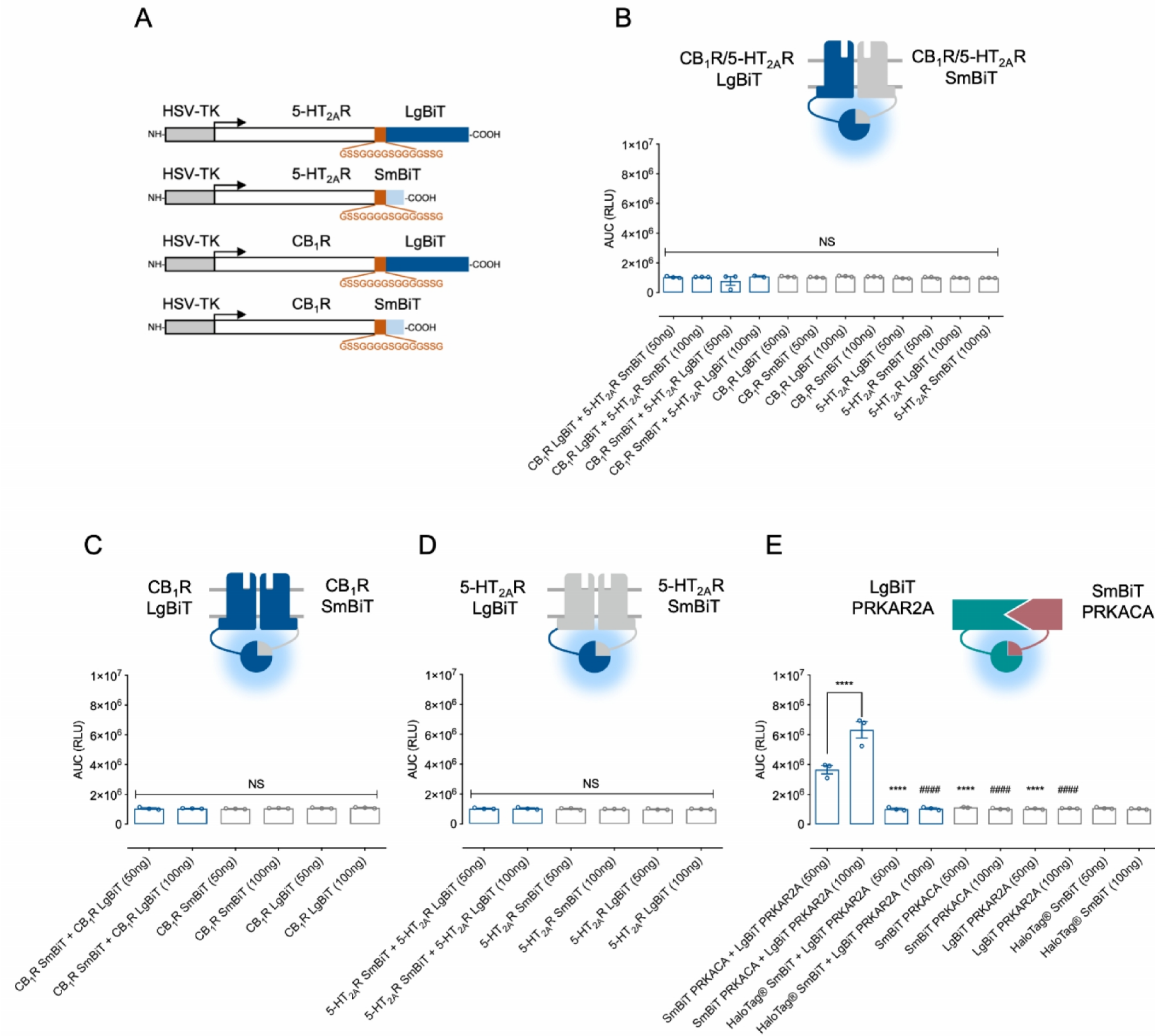

**Supplementary figure 1. Conformational screening of the optimal orientation for CB<sub>1</sub>, 5-HT<sub>2A</sub> and 5-HT<sub>2A</sub>-CB<sub>1</sub> receptor oligomers. HSV-TK promoter studies. (A)** Schematic representation of the NanoLuc fusion proteins. HEK-293 cells were transiently transfected with all possible orientations of LgBiT and SmBiT C-terminal fusions at two different DNA ratios (50 or 100 ng receptor/well) to assess 5-HT<sub>2A</sub>R-CB<sub>1</sub>R heteromers **(B)** or CB<sub>1</sub>R **(C)** and 5-HT<sub>2A</sub>R **(D)** homomers. In **(E)**, the SmBiT-PRKACA and LgBiT-PRKAR2A positive interacting control was transfected under the same conditions. The LgBiT-PRKAR2A plus HaloTag®-SmBiT combination was used as a non-interacting negative control. Grey bars represent the RLU of each individual construct expressed alone. Data are mean AUC (RLU) ± SEM (n = 3). Statistical significance was evaluated by one-way analysis of variance (ANOVA) followed by Bonferroni post hoc tests showing significant effects over SmBiT PRKACA + LgBiT PRKAR2A (50 ng) (\*\*\*\*p ≤ 0.0001) or over SmBiT PRKACA + LgBiT PRKAR2A (100 ng) (#####p ≤ 0.0001). HSV-TK, herpes simplex virus thymidine kinase gene promoter; NS, non-statistical significant.

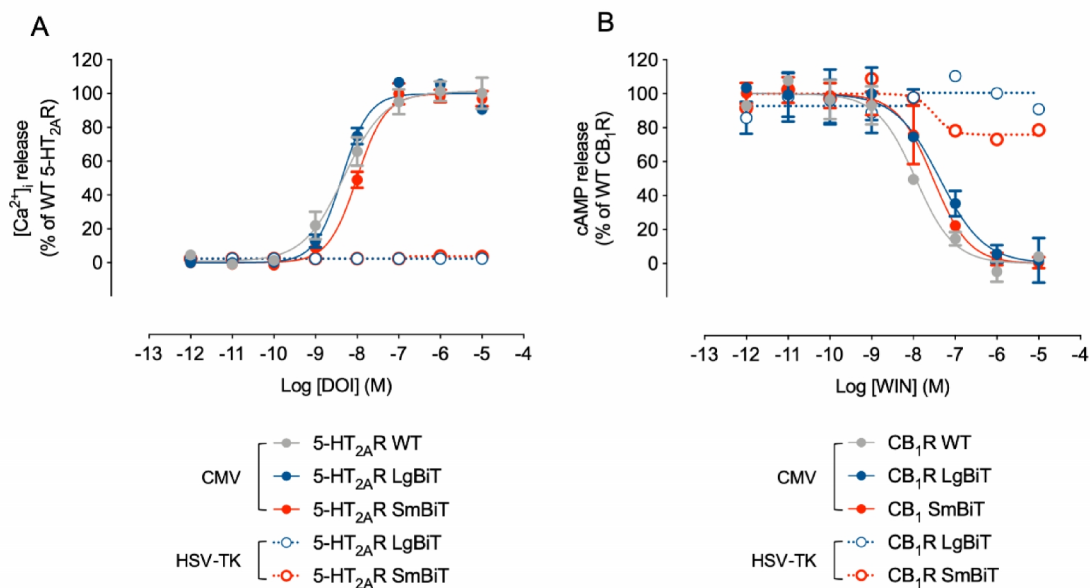

|                            | CMV promoter | HSV-TK promoter |
|----------------------------|--------------|-----------------|
| 5-HT <sub>2A</sub> R WT    | 8.31 ± 0.13  | -               |
| 5-HT <sub>2A</sub> R LgBiT | 8.37 ± 0.06  | N.D.            |
| 5-HT <sub>2A</sub> R SmBiT | 8.01 ± 0.06  | N.D.            |
| CB <sub>1</sub> R WT       | 7.95 ± 0.14  | -               |
| CB <sub>1</sub> R LgBiT    | 7.37 ± 0.16  | N.D.            |
| CB <sub>1</sub> R SmBiT    | 7.52 ± 0.09  | 7.51 ± 0.35     |

**Supplementary figure 2. Functional validation of NanoBiT C-terminal fusions.** In (A), dose-response intracellular Ca<sup>2+</sup> release curves for 5-HT<sub>2A</sub>R constructs. In (B), forskolin-induced (7.5 μM) cAMP release inhibition dose-response curves for CB<sub>1</sub>R. Data are mean ± SD (n ≥ 2) percentage of activation normalised to each wild type receptor maximal response. The bottom table represents the mean pEC<sub>50</sub>/pIC<sub>50</sub> ± SD (n ≥ 2). HSV-TK, herpes simplex virus thymidine kinase gene promoter; CMV, human cytomegalovirus immediate-early promoter. ND, non-determined, indicates non-convergent curve fits.

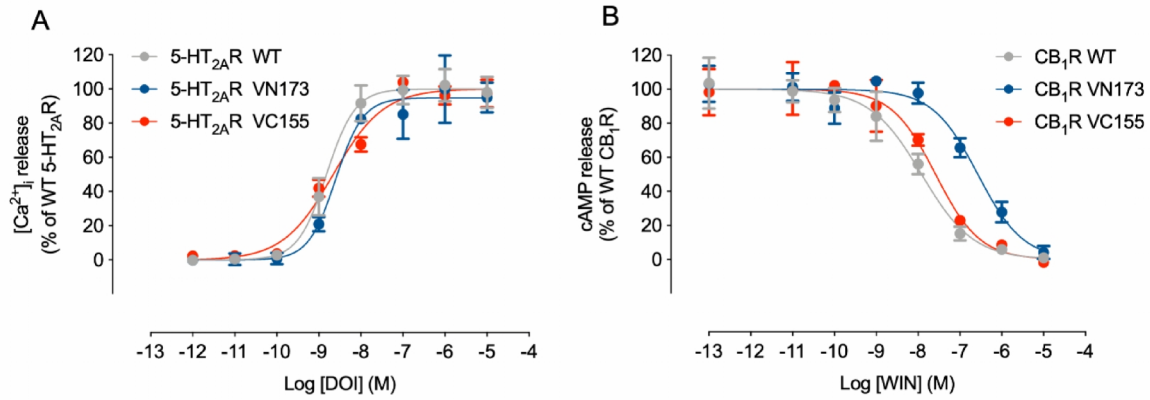

|                            | pEC <sub>50</sub> /IC <sub>50</sub> |
|----------------------------|-------------------------------------|
| 5-HT <sub>2A</sub> R WT    | 8.82 ± 0.11                         |
| 5-HT <sub>2A</sub> R VN173 | 8.60 ± 0.16                         |
| 5-HT <sub>2A</sub> R VC155 | 8.66 ± 0.13                         |
| CB <sub>1</sub> R WT       | 7.92 ± 0.13                         |
| CB <sub>1</sub> R VN173    | 6.57 ± 0.16**                       |
| CB <sub>1</sub> R VC155    | 7.58 ± 0.20                         |

**Supplementary figure 3. Functional validation of split Venus YFP C-terminal fusions.** In (A), dose-response intracellular Ca<sup>2+</sup> release curves for 5-HT<sub>2A</sub>R constructs. In (B), forskolin-induced (7.5 μM) cAMP release inhibition dose-response curves for CB<sub>1</sub>R. Data are mean ± SD (n ≥ 2) percentage of activation normalised to each wild type receptor maximal response. The bottom table represents the mean pEC<sub>50</sub>/pIC<sub>50</sub> ± SD (n ≥ 2). Statistical significance was evaluated by one-way ANOVA followed by Bonferroni post hoc tests indicating significant differences over its respective WT receptor (\*\*p ≤ 0.01).

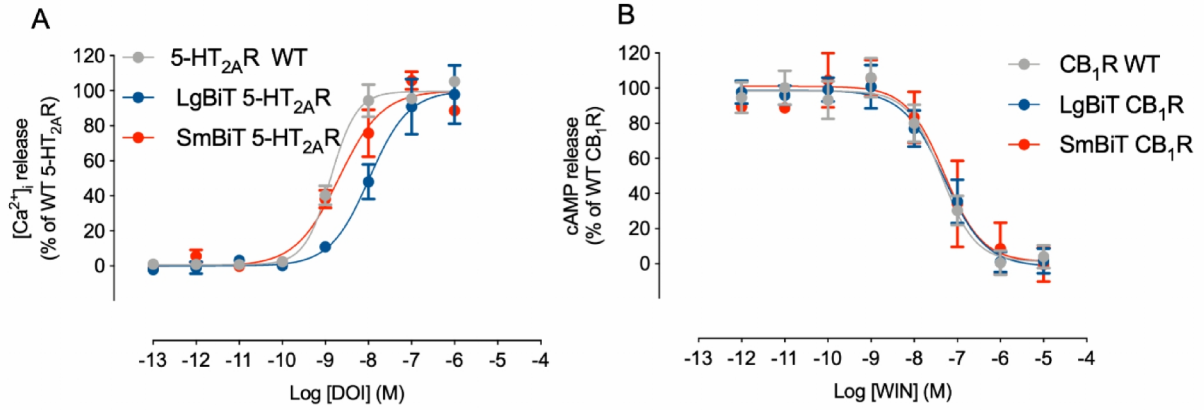

|                            | pEC <sub>50</sub> /IC <sub>50</sub> |
|----------------------------|-------------------------------------|
| 5-HT <sub>2A</sub> R WT    | 8.88 ± 0.09                         |
| LgBiT 5-HT <sub>2A</sub> R | 7.98 ± 0.16*                        |
| SmBiT 5-HT <sub>2A</sub> R | 8.69 ± 0.16                         |
| CB <sub>1</sub> R WT       | 7.36 ± 0.18                         |
| LgBiT CB <sub>1</sub> R    | 7.30 ± 0.15                         |
| SmBiT CB <sub>1</sub> R    | 7.30 ± 0.17                         |

**Supplementary figure 4. Functional validation of NanoBiT N-terminal fusions.** In (A), dose-response intracellular Ca<sup>2+</sup> release curves for 5-HT<sub>2A</sub>R constructs. In (B), forskolin-induced (7.5μM) cAMP release inhibition dose-response curves for CB<sub>1</sub>R. Data are mean ± SD (n≥2) percentage of activation normalised to each wild type receptor maximal response. The bottom table represents the mean pEC<sub>50</sub>/pIC<sub>50</sub> ± SD (n≥2). Statistical significance was evaluated by one-way ANOVA followed by Bonferroni post hoc tests indicating significant differences over its respective WT receptor (\*p ≤ 0.05).

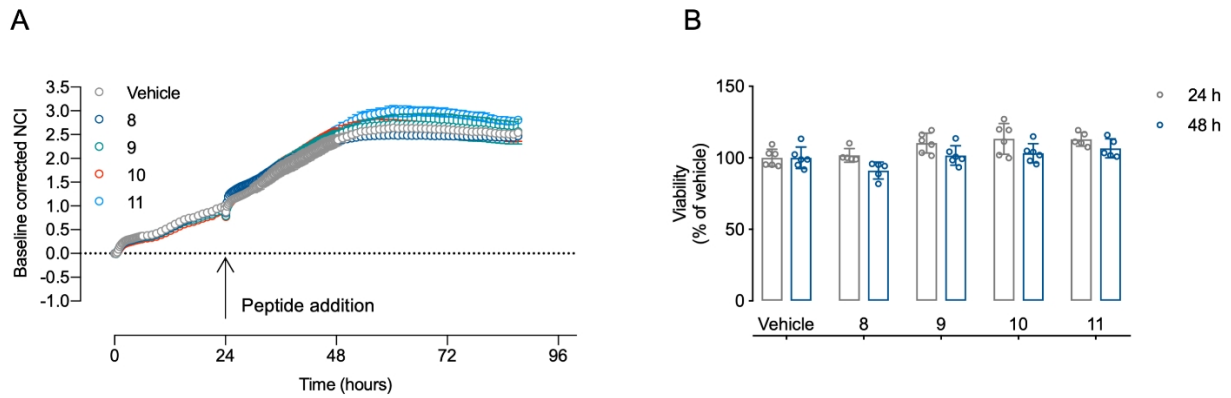

**Supplementary figure 5. Label-free real-time evaluation of peptide toxicity.** (A) Representative real-time iCELLigence RTCA impedance traces monitoring cell growth after peptide ( $4 \mu\text{M}$ ) addition. Data are shown as the mean baseline corrected NCI  $\pm$  SD ( $n=2-3$ ). In (B), bar graphs plotting cell index values 24- and 48-hours post-peptide addition. Data are mean  $\pm$  SEM ( $n \geq 5$ ) normalised to vehicle-treated cells. Statistical significance was evaluated by two-way analysis of variance (ANOVA) followed by Bonferroni post hoc tests showing no statistically significant reduction in viability.

Supplementary table 1.

| Plasmid name                                                                                                                                                                                                                                                                                                                                                                                                                                                                                                                                                                                                                                                                                                                                    | Backbone             | Backbone primers (5' 3') |                                       | Insert                                | Insert primers (5' 3') |                                        |
|-------------------------------------------------------------------------------------------------------------------------------------------------------------------------------------------------------------------------------------------------------------------------------------------------------------------------------------------------------------------------------------------------------------------------------------------------------------------------------------------------------------------------------------------------------------------------------------------------------------------------------------------------------------------------------------------------------------------------------------------------|----------------------|--------------------------|---------------------------------------|---------------------------------------|------------------------|----------------------------------------|
| <b>HSV-TK-3xHA-5-HT<sub>2A</sub>R-LgBiT</b>                                                                                                                                                                                                                                                                                                                                                                                                                                                                                                                                                                                                                                                                                                     | pBiT1.1-C [TK/LgBiT] | FW                       | CTGTGTGGGCTCGAGCG<br>GTGGTGCC         | pcDNA3.1(+)-3xHA-5-HT <sub>2A</sub> R | FW                     | GGAATTCTGGTACCACCATGT<br>ACCCATACGA    |
|                                                                                                                                                                                                                                                                                                                                                                                                                                                                                                                                                                                                                                                                                                                                                 |                      | RV                       | GGTGGTACCAGAATTCC<br>CCTGAGCTCC       |                                       | RV                     | CTCGAGCCACACAGCTCACC<br>TTTTCATTCACTCC |
| <p>MYPYDVPDYAYPYDVPDYAYPYDVPDYAD DILCEENTSLSSTTNSLMQLNDDTRLYSNDFNNGEANTSDAFNWTVDSENRTNLSCE<br/> GCLSPSCLSLHLQEKNWALLTAVVILTIAGNILVIMAVSLEKKLQATNYFLMSLAIDMLLGLFVMPVSMILTILYGYRWPLPSKLC<br/> VWIYLDVLFSTASIMHLCAISLDTRYVAIQNPIHHSRFSNRKAFKIIAVWTISVGISMPPIPVFGLQDDSKVFKEGSCLLADDNFVLIGSFV<br/> SFFIPLTIMVITYFLTIKSLQKEATLCVSDLGTRAKLASFSFLPQSSLSSEKLFQRSIHREPGSYTGRRTMQSISNEQKACKVLGIVFFLFV<br/> VMWCPFFITNIMAVICKESCNEVDIGALLNVFWWIGYLSAVNPLVYTLFNKTYRSAFSRYIQCYKENKKPLQLILVNTIPALAYKSSQL<br/> QMGGKNSKQDAKTTDNDCSMVALGKQHSEEAASKDNSDGVNEKVCV GSSGGGGSSGGGGSSGVFTLEDFVGDWEQTAAYNLDQ<br/> VLEQGGVSSLLQNLAVSVTPIQIRIVRSGENALKIDIHVIIPYEGLSADQMAQIEEVFKVVYPVDDHHFKVILPYGTLVIDGVTPNMLNYFG<br/> RPYEGIAVFDGKKITVTGTLWNGNKIIDERLITPDGSMFLFRVTINS</p>  |                      |                          |                                       |                                       |                        |                                        |
| <b>HSV-TK-3xHA-5-HT<sub>2A</sub>R-SmBiT</b>                                                                                                                                                                                                                                                                                                                                                                                                                                                                                                                                                                                                                                                                                                     | pBiT2.1-C [TK/SmBiT] | FW                       | CTGTGTGGGCTCGAGCG<br>GTGGTGCC         | pcDNA3.1(+)-3xHA-5-HT <sub>2A</sub> R | FW                     | GGAATTCTGGTACCACCATGT<br>ACCCATACGA    |
|                                                                                                                                                                                                                                                                                                                                                                                                                                                                                                                                                                                                                                                                                                                                                 |                      | RV                       | GGTGGTACCAGAATTCC<br>CCTGAGCTCC       |                                       | RV                     | CTCGAGCCACACAGCTCACC<br>TTTTCATTCACTCC |
| <p>MYPYDVPDYAYPYDVPDYAYPYDVPDYAD DILCEENTSLSSTTNSLMQLNDDTRLYSNDFNNGEANTSDAFNWTVDSENRTNLSCE<br/> GCLSPSCLSLHLQEKNWALLTAVVILTIAGNILVIMAVSLEKKLQATNYFLMSLAIDMLLGLFVMPVSMILTILYGYRWPLPSKLC<br/> VWIYLDVLFSTASIMHLCAISLDTRYVAIQNPIHHSRFSNRKAFKIIAVWTISVGISMPPIPVFGLQDDSKVFKEGSCLLADDNFVLIGSFV<br/> SFFIPLTIMVITYFLTIKSLQKEATLCVSDLGTRAKLASFSFLPQSSLSSEKLFQRSIHREPGSYTGRRTMQSISNEQKACKVLGIVFFLFV<br/> VMWCPFFITNIMAVICKESCNEVDIGALLNVFWWIGYLSAVNPLVYTLFNKTYRSAFSRYIQCYKENKKPLQLILVNTIPALAYKSSQL<br/> QMGGKNSKQDAKTTDNDCSMVALGKQHSEEAASKDNSDGVNEKVCV GSSGGGGSSGGGGSSGVFTLEDFVGDWEQTAAYNLDQ<br/> VLEQGGVSSLLQNLAVSVTPIQIRIVRSGENALKIDIHVIIPYEGLSADQMAQIEEVFKVVYPVDDHHFKVILPYGTLVIDGVTPNMLNYFG<br/> RPYEGIAVFDGKKITVTGTLWNGNKIIDERLITPDGSMFLFRVTINS</p>  |                      |                          |                                       |                                       |                        |                                        |
| <b>HSV-TK-3xHA-CB<sub>1</sub>R-LgBiT</b>                                                                                                                                                                                                                                                                                                                                                                                                                                                                                                                                                                                                                                                                                                        | pBiT1.1-C [TK/LgBiT] | FW                       | TCTGCCGAGGCTCTGGG<br>CTCGAGCGGTGGT    | pcDNA3.1(+)-3xHA-CB <sub>1</sub> R    | FW                     | GCTCAGGGGAATTCTGGTACC<br>ACCATGTACCC   |
|                                                                                                                                                                                                                                                                                                                                                                                                                                                                                                                                                                                                                                                                                                                                                 |                      | RV                       | GTACATGGTGGTACCAG<br>AATTCCCCTGAGCTCC |                                       | RV                     | ACCACCGCTCGAGCCCAGAG<br>CCTCGGCAGA     |
| <p>MYPYDVPDYAYPYDVPDYAYPYDVPDYAD KSILDGLADTTFRITITDILLVYGSNDIQYEDIKGDMSKLGYPQKFPPLTSFRGSPFQE<br/> KMTAGDNPQLVPADQVNITEFYNKSLSSFKENEENIQCGENFMIECFMVLNPSQQLAIAVLSLTLGTFTVLENLLVLCVILHSRSLRC<br/> RPSYHFIGSLAVADLLGSVIFVYSFIDFHFVHRKDSRVNLFKLGCVTASFTASVGSFLTAIDRYISHRPLAYKRIVTRPKAVVAFCLM<br/> WTIAIVAVLPLLGNWCEKLSVCSDFPHIDETYLFWWIGVTSVLLLFIVYAYMYILWKAHSHAVRMIQRGTQKSIHHTSEDKVQVTRP<br/> DQARMDIRLAKTLVLILVLLIICWGPELLAIMVYDVFVGKMNKLIKTVFAFCMSMLCLLNSTVNPIIALRSKDLRHFARSMFPSCGTAQPLD<br/> NSMGDSDCLHKHANNAAASVHRAAESCIKSTVKIAKVTMSVSTDSAEAL GSSGGGGSSGGGGSSGVFTLEDFVGDWEQTAAYNLDQ<br/> VLEQGGVSSLLQNLAVSVTPIQIRIVRSGENALKIDIHVIIPYEGLSADQMAQIEEVFKVVYPVDDHHFKVILPYGTLVIDGVTPNMLNYFG<br/> RPYEGIAVFDGKKITVTGTLWNGNKIIDERLITPDGSMFLFRVTINS</p> |                      |                          |                                       |                                       |                        |                                        |
| <b>HSV-TK-3xHA-CB<sub>1</sub>R-SmBiT</b>                                                                                                                                                                                                                                                                                                                                                                                                                                                                                                                                                                                                                                                                                                        | pBiT2.1-C [TK/SmBiT] | FW                       | TCTGCCGAGGCTCTGGG<br>CTCGAGCGGTGGT    | pcDNA3.1(+)-3xHA-CB <sub>1</sub> R    | FW                     | GCTCAGGGGAATTCTGGTACC<br>ACCATGTACCC   |
|                                                                                                                                                                                                                                                                                                                                                                                                                                                                                                                                                                                                                                                                                                                                                 |                      | RV                       | GTACATGGTGGTACCAG<br>AATTCCCCTGAGCTCC |                                       | RV                     | ACCACCGCTCGAGCCCAGAG<br>CCTCGGCAGA     |
| <p>MYPYDVPDYAYPYDVPDYAYPYDVPDYAD KSILDGLADTTFRITITDILLVYGSNDIQYEDIKGDMSKLGYPQKFPPLTSFRGSPFQE<br/> KMTAGDNPQLVPADQVNITEFYNKSLSSFKENEENIQCGENFMIECFMVLNPSQQLAIAVLSLTLGTFTVLENLLVLCVILHSRSLRC<br/> RPSYHFIGSLAVADLLGSVIFVYSFIDFHFVHRKDSRVNLFKLGCVTASFTASVGSFLTAIDRYISHRPLAYKRIVTRPKAVVAFCLM<br/> WTIAIVAVLPLLGNWCEKLSVCSDFPHIDETYLFWWIGVTSVLLLFIVYAYMYILWKAHSHAVRMIQRGTQKSIHHTSEDKVQVTRP<br/> DQARMDIRLAKTLVLILVLLIICWGPELLAIMVYDVFVGKMNKLIKTVFAFCMSMLCLLNSTVNPIIALRSKDLRHFARSMFPSCGTAQPLD<br/> NSMGDSDCLHKHANNAAASVHRAAESCIKSTVKIAKVTMSVSTDSAEAL GSSGGGGSSGGGGSSGVFTLEDFVGDWEQTAAYNLDQ<br/> VLEQGGVSSLLQNLAVSVTPIQIRIVRSGENALKIDIHVIIPYEGLSADQMAQIEEVFKVVYPVDDHHFKVILPYGTLVIDGVTPNMLNYFG<br/> RPYEGIAVFDGKKITVTGTLWNGNKIIDERLITPDGSMFLFRVTINS</p> |                      |                          |                                       |                                       |                        |                                        |

|                                                                                                                                                                                                                                                                                                                                                                                                                                                                                                                                                                                                                                                                                                                                       |                                       |    |                                                  |                         |    |                                        |
|---------------------------------------------------------------------------------------------------------------------------------------------------------------------------------------------------------------------------------------------------------------------------------------------------------------------------------------------------------------------------------------------------------------------------------------------------------------------------------------------------------------------------------------------------------------------------------------------------------------------------------------------------------------------------------------------------------------------------------------|---------------------------------------|----|--------------------------------------------------|-------------------------|----|----------------------------------------|
| <b>CMV-3xHA-5-HT<sub>2A</sub>R-LgBiT</b>                                                                                                                                                                                                                                                                                                                                                                                                                                                                                                                                                                                                                                                                                              | pcDNA3.1(+)-3xHA-5-HT <sub>2A</sub> R | FW | GTAACCATCAACAGCTG<br>ACTCGAGTCTAGAGGG            | pBiT1.1-C<br>[TK/LgBiT] | FW | AAGGTGAGCTGTGTGGGCTC<br>GAGCGGTGGT     |
|                                                                                                                                                                                                                                                                                                                                                                                                                                                                                                                                                                                                                                                                                                                                       |                                       | RV | ACCACCGCTCGAGCCCA<br>CACAGCTCACCTTTTC            |                         | RV | TCTAGACTCGAGTCAGCTGTT<br>GATGGTTACTCGG |
| MYPYDVPDYAYPYDVPDYAYPYDVPDYAD DILCEENTSLSSTTNSLMQLNDDTRLYSNDNFNSGEANTSDAFNWTVDSENRTNLSCE<br>GCLSPSCLSLHLQEKNSWALLTAVVILTIAGNILVIMAVSLEKKLQATNYFLMSLAIADMLLGLVMPVSMILTILYGYRWPLPSKLC<br>VWIYLDVLFSTASIMHLCAISLDYVAIQNPIHHSRFSNRKAFKIIAVWTISVGI SMPIPVFLQDDSKVFKEGSCLLADDNFVLIGSFV<br>SFFIPLTIMVITYFLTIKSLQKEATLCVSDLGTRAKLASFSFLPQSSLSSEKLFQRSIHREPGSYTGRRTMQSISNEQKACKVLGIVFFLV<br>VMWC PFFITNIMAVICKESCNECDVIGALLNVFVWIGYLSAVNPLVYTLFNKTYRSAFSRYICQCYKENKKPLQLILVNTIPALAYKSSQL<br>QMGQKNSKQDAKTDDNDCSMVALGKQHSEASKDSDGVNEKVS CVGSSGGGGSGGGGSSGVFTLEDFVGDWEQTAAYNL DQ<br>VLEQGGVSSLLQNLAVSVTPIQRIVRSGENALKIDIHVIPIEGLSADQMAQIEEVFKVVPVDDHFFKVLIPYGLVIDGVTNMLNYFG<br>RPEYEGIAVFDGKKITVTGTLWNGNKIIDERLITPDGSM LFRVTINS                  |                                       |    |                                                  |                         |    |                                        |
| <b>CMV-3xHA-5-HT<sub>2A</sub>R-SmBiT</b>                                                                                                                                                                                                                                                                                                                                                                                                                                                                                                                                                                                                                                                                                              | pcDNA3.1(+)-3xHA-5-HT <sub>2A</sub> R | FW | TTCGAGGAGATTCTGTG<br>ACTCGAGTCTAGAGGG            | pBiT2.1-C<br>[TK/SmBiT] | FW | AAGGTGAGCTGTGTGGGCTC<br>GAGCGGTGGT     |
|                                                                                                                                                                                                                                                                                                                                                                                                                                                                                                                                                                                                                                                                                                                                       |                                       | RV | ACCACCGCTCGAGCCCA<br>CACAGCTCACCTTTTC            |                         | RV | TCTAGACTCGAGTCACAGAAT<br>CTCCTCGAACAGC |
| MYPYDVPDYAYPYDVPDYAYPYDVPDYAD DILCEENTSLSSTTNSLMQLNDDTRLYSNDNFNSGEANTSDAFNWTVDSENRTNLSCE<br>GCLSPSCLSLHLQEKNSWALLTAVVILTIAGNILVIMAVSLEKKLQATNYFLMSLAIADMLLGLVMPVSMILTILYGYRWPLPSKLC<br>VWIYLDVLFSTASIMHLCAISLDYVAIQNPIHHSRFSNRKAFKIIAVWTISVGI SMPIPVFLQDDSKVFKEGSCLLADDNFVLIGSFV<br>SFFIPLTIMVITYFLTIKSLQKEATLCVSDLGTRAKLASFSFLPQSSLSSEKLFQRSIHREPGSYTGRRTMQSISNEQKACKVLGIVFFLV<br>VMWC PFFITNIMAVICKESCNECDVIGALLNVFVWIGYLSAVNPLVYTLFNKTYRSAFSRYICQCYKENKKPLQLILVNTIPALAYKSSQL<br>QMGQKNSKQDAKTDDNDCSMVALGKQHSEASKDSDGVNEKVS CVGSSGGGGSGGGGSSGVFTLEDFVGDWEQTAAYNL DQ<br>VLEQGGVSSLLQNLAVSVTPIQRIVRSGENALKIDIHVIPIEGLSADQMAQIEEVFKVVPVDDHFFKVLIPYGLVIDGVTNMLNYFG<br>RPEYEGIAVFDGKKITVTGTLWNGNKIIDERLITPDGSM LFRVTINS                  |                                       |    |                                                  |                         |    |                                        |
| <b>CMV-3xHA-CB<sub>1</sub>R-LgBiT</b>                                                                                                                                                                                                                                                                                                                                                                                                                                                                                                                                                                                                                                                                                                 | pcDNA3.1(+)-3xHA-CB <sub>1</sub> R    | FW | GTAACCATCAACAGCTG<br>ACTCGAGTCTAGAGGG            | pBiT1.1-C<br>[TK/LgBiT] | FW | TCTGCCGAGGCTCTGGGCTC<br>GAGCGGTGGT     |
|                                                                                                                                                                                                                                                                                                                                                                                                                                                                                                                                                                                                                                                                                                                                       |                                       | RV | ACCACCGCTCGAGCCCA<br>GAGCCTCGGCAGA               |                         | RV | TCTAGACTCGAGTCAGCTGTT<br>GATGGTTACTCGG |
| MYPYDVPDYAYPYDVPDYAYPYDVPDYAD KSILDGLADTTFRITITD LLYVGSNDIQYEDIKGD MASKLGYFPQKFP LTSFRGSPFQE<br>KMTAGDNPQLVPADQVNIT EFNKSLSSFKENEENIQCGENFM DIECFMVLNPSQQLAIAVLSLTLGTFTVLENLLVLCVILHSRSLRC<br>RPSYHFIGSLAVADLLGSVIFVYSFIDFHVFHRKDSRNVFLKLG VGTASFTASVGSFLTAIDRYISIH RPLAYKRIVTRPKAVVAFCLM<br>WTIAIAI AVLPLLGNWCEKLSVCSDFPHIDET YLMFWIGVTSV LLLFIVYAYMYILWKAHSHAVRMIQRGTQKSI IHTSEDGKVQVTRP<br>DQARMDIRLAKTLVLILVLIICWG PLLAIMVYDVF GKMNKLIKTVFAFC SMLCLLNSTVNPIIYALRSKDLRHAFRSMF PSCGTAQPLD<br>NSMGDSDCLHKHANNAASVHRAAESCIKSTVKIAKV TMSVSTDTSAEALGSSGGGGSGGGGSSGVFTLEDFVGDWEQTAAYNL DQ<br>VLEQGGVSSLLQNLAVSVTPIQRIVRSGENALKIDIHVIPIEGLSADQMAQIEEVFKVVPVDDHFFKVLIPYGLVIDGVTNMLNYFG<br>RPEYEGIAVFDGKKITVTGTLWNGNKIIDERLITPDGSM LFRVTINS |                                       |    |                                                  |                         |    |                                        |
| <b>CMV-3xHA-CB<sub>1</sub>R-SmBiT</b>                                                                                                                                                                                                                                                                                                                                                                                                                                                                                                                                                                                                                                                                                                 | pcDNA3.1(+)-3xHA-CB <sub>1</sub> R    | FW | TTCGAGGAGATTCTGTG<br>ACTCGAGTCTAGAGGG            | pBiT2.1-C<br>[TK/SmBiT] | FW | TCTGCCGAGGCTCTGGGCTC<br>GAGCGGTGGT     |
|                                                                                                                                                                                                                                                                                                                                                                                                                                                                                                                                                                                                                                                                                                                                       |                                       | RV | ACCACCGCTCGAGCCCA<br>GAGCCTCGGCAGA               |                         | RV | TCTAGACTCGAGTCACAGAAT<br>CTCCTCGAACAGC |
| MYPYDVPDYAYPYDVPDYAYPYDVPDYAD KSILDGLADTTFRITITD LLYVGSNDIQYEDIKGD MASKLGYFPQKFP LTSFRGSPFQE<br>KMTAGDNPQLVPADQVNIT EFNKSLSSFKENEENIQCGENFM DIECFMVLNPSQQLAIAVLSLTLGTFTVLENLLVLCVILHSRSLRC<br>RPSYHFIGSLAVADLLGSVIFVYSFIDFHVFHRKDSRNVFLKLG VGTASFTASVGSFLTAIDRYISIH RPLAYKRIVTRPKAVVAFCLM<br>WTIAIAI AVLPLLGNWCEKLSVCSDFPHIDET YLMFWIGVTSV LLLFIVYAYMYILWKAHSHAVRMIQRGTQKSI IHTSEDGKVQVTRP<br>DQARMDIRLAKTLVLILVLIICWG PLLAIMVYDVF GKMNKLIKTVFAFC SMLCLLNSTVNPIIYALRSKDLRHAFRSMF PSCGTAQPLD<br>NSMGDSDCLHKHANNAASVHRAAESCIKSTVKIAKV TMSVSTDTSAEALGSSGGGGSGGGGSSGVFTLEDFVGDWEQTAAYNL DQ<br>VLEQGGVSSLLQNLAVSVTPIQRIVRSGENALKIDIHVIPIEGLSADQMAQIEEVFKVVPVDDHFFKVLIPYGLVIDGVTNMLNYFG<br>RPEYEGIAVFDGKKITVTGTLWNGNKIIDERLITPDGSM LFRVTINS |                                       |    |                                                  |                         |    |                                        |
| <b>CMV-LgBiT-5-HT<sub>2A</sub>R</b>                                                                                                                                                                                                                                                                                                                                                                                                                                                                                                                                                                                                                                                                                                   | pcDNA3.1(+)-3xHA-5-HT <sub>2A</sub> R | FW | GGAGGCTCGAGCGGTG<br>ATATTCTTTGTGAAGAAA<br>ATACTT | pBiT1.1-N<br>[TK/LgBiT] | FW | AAGCTTGGTACCACCATGGTC<br>TTCACACTCGAAG |
|                                                                                                                                                                                                                                                                                                                                                                                                                                                                                                                                                                                                                                                                                                                                       |                                       | RV | GAGTGTGAAGACCATGG                                |                         | RV | TTCACAAAGAATATCACCCT                   |



|                                                                                                                                                                                                                                                                                                                                                                                                                                                                                                                                                                                                                                                                                                             |                                       |    |                                                  |                         |    |                                        |
|-------------------------------------------------------------------------------------------------------------------------------------------------------------------------------------------------------------------------------------------------------------------------------------------------------------------------------------------------------------------------------------------------------------------------------------------------------------------------------------------------------------------------------------------------------------------------------------------------------------------------------------------------------------------------------------------------------------|---------------------------------------|----|--------------------------------------------------|-------------------------|----|----------------------------------------|
|                                                                                                                                                                                                                                                                                                                                                                                                                                                                                                                                                                                                                                                                                                             |                                       |    | TGGTACCAAGCTTAAG                                 |                         |    | CGAGCCTCC                              |
| <p>MVFTLEDVFGDWEQTAAYNLDQVLEQGGVSSLLQNLAVSVTPIQRIVRSGENALKIDIHVIIPYEGLSADQMAQIEEVFKVVPVDDHH<br/> FKVILPYGTLVIDGVTNMLNLYFRPYEGIAVFDGKKITVTGTLWNGNKIIDERLITPDGSMLFRVTINS GSSGGGGSSGGGGSSGDILC<br/> EENTSLSTTNSLMQLNDDTRLYSNDFNSGEANTSDFNWTVDSENRTNLSCEGCLSPSCLSLHLHQEKNSWALLTAVVIILTIAGNIL<br/> VIMAVSLEKKLNATNYFLMSLAIDMLLGLFVMPVSMILTILYGYRWPLPSKLCVWYLDVLFSTASIMHLCAISLDYVAIQNPIHHSR<br/> FNSRTKAFKIIAVWTISVGI SMPIPVFLQDDSKVFKEGSCLLADDFVLIGSFVFFIPLTIMVITYFLTIKSLQKEATLCVSDLGTRAKL<br/> ASFSLPQSSLSSEKLFQRSIHREPGSYTGRRTMQSISNEQKACKVLGIVFFLVMMWCPFFITNIMAVICKESCNEDEVIGALLNVFVWI<br/> GYLSSAVNPLVYTLFNKTYSAFSRYIQCYKENKKPLQLILVNTIPALAYKSSQLQMGQKKNKQDAKTDDNDCSMVALGKQHSEE<br/> SKDNSDGVNEKVSCV</p>     |                                       |    |                                                  |                         |    |                                        |
| <b>CMV-SmBiT-5-HT<sub>2A</sub>R</b>                                                                                                                                                                                                                                                                                                                                                                                                                                                                                                                                                                                                                                                                         | pcDNA3.1(+)-3xHA-5-HT <sub>2A</sub> R | FW | GGAGGCTCGAGCGGTG<br>ATATTCTTTGTGAAGAAA<br>ATACTT | pBiT2.1-N<br>[TK/SmBiT] | FW | AAGCTTGGTACCACCATGGT<br>ACCGGCTACC     |
|                                                                                                                                                                                                                                                                                                                                                                                                                                                                                                                                                                                                                                                                                                             |                                       | RV | GTAGCCGGTCACCATGG<br>TGGTACCAAGCTTAAG            |                         | RV | TTCACAAAGAATATCACCGCT<br>CGAGCCTCC     |
| <p>MVTGYRLFEEILGSSGGGGSSGGGGSSGDILCEENTSLSTTNSLMQLNDDTRLYSNDFNSGEANTSDFNWTVDSENRTNLSCEG<br/> LSPSCLSLHLHQEKNSWALLTAVVIILTIAGNILVIMAVSLEKKLNATNYFLMSLAIDMLLGLFVMPVSMILTILYGYRWPLPSKLCVWY<br/> YLDVLFSTASIMHLCAISLDYVAIQNPIHHSRFNSRTKAFKIIAVWTISVGI SMPIPVFLQDDSKVFKEGSCLLADDFVLIGSFVFFI<br/> PLTIMVITYFLTIKSLQKEATLCVSDLGTRAKLASFSFLPQSSLSSEKLFQRSIHREPGSYTGRRTMQSISNEQKACKVLGIVFFLVMM<br/> WCPFFITNIMAVICKESCNEDEVIGALLNVFVWIGYLSSAVNPLVYTLFNKTYSAFSRYIQCYKENKKPLQLILVNTIPALAYKSSQLQ<br/> MGQKKNKQDAKTDDNDCSMVALGKQHSEEASKDNSDGVNEKVSCV</p>                                                                                                                                                                 |                                       |    |                                                  |                         |    |                                        |
| <b>CMV-LgBiT-CB<sub>1</sub>R</b>                                                                                                                                                                                                                                                                                                                                                                                                                                                                                                                                                                                                                                                                            | pcDNA3.1(+)-3xHA-CB <sub>1</sub> R    | FW | GGAGGCTCGAGCGGTA<br>AGTCGATCCTAGATGGC<br>C       | pBiT1.1-N<br>[TK/LgBiT] | FW | AAGCTTGGTACCACCATGGTC<br>TTCACACTCGAAG |
|                                                                                                                                                                                                                                                                                                                                                                                                                                                                                                                                                                                                                                                                                                             |                                       | RV | GAGTGTGAAGACCATGG<br>TGGTACCAAGCTTAAGT           |                         | RV | ATCTAGGATCGACTTACCGCT<br>CGAGCCTCC     |
| <p>MVFTLEDVFGDWEQTAAYNLDQVLEQGGVSSLLQNLAVSVTPIQRIVRSGENALKIDIHVIIPYEGLSADQMAQIEEVFKVVPVDDHH<br/> FKVILPYGTLVIDGVTNMLNLYFRPYEGIAVFDGKKITVTGTLWNGNKIIDERLITPDGSMLFRVTINS GSSGGGGSSGGGGSSGKSILD<br/> GLADTTFRITDLDLYVGSNDIQYEDIKGDMSKLGYPQKFLPTFRGSPFQEKMTAGDNPQLVPADQVNITEFYNKSLSSFKENEE<br/> NIQCGENFMDIECFMVLNPSQQLAIAVLSLTLGTFTVLENLLVLCVILHSRSLRCRPSYHFIGSLAVADLLGVSIFVYSFIDFHVHFRKDS<br/> RNVFLFKLGGVTASFTASVGSFLTAIDRYISIHRLAYKRIVTRPKAVVAFCLMWTIAIVIAVPLLLGWNCEKLSVCSDFPHIDETYL<br/> MFWIGVTSVLLLFIVYAYMYILWKAHSHAVRMIQRGTQKSIIHTSEDGKVQVTRPDQARMDIRLAKTLVLILVLIICWGPELLAIMVYDVF<br/> KMNKLIKTVFAFCSMLCLLNSTVNPPIYALRSKDLRHAFRSMFSPCEGTAQPLDNSMGSDCLHKKHANNAASVHRAAESCIKSTVKIAK<br/> VTMSVSTDSAEAL</p> |                                       |    |                                                  |                         |    |                                        |
| <b>CMV-SmBiT-CB<sub>1</sub>R</b>                                                                                                                                                                                                                                                                                                                                                                                                                                                                                                                                                                                                                                                                            | pcDNA3.1(+)-3xHA-CB <sub>1</sub> R    | FW | GGAGGCTCGAGCGGTA<br>AGTCGATCCTAGATGGC<br>C       | pBiT2.1-N<br>[TK/SmBiT] | FW | AAGCTTGGTACCACCATGGT<br>ACCGGCTACC     |
|                                                                                                                                                                                                                                                                                                                                                                                                                                                                                                                                                                                                                                                                                                             |                                       | RV | GTAGCCGGTCACCATGG<br>TGGTACCAAGCTTAAGT           |                         | RV | ATCTAGGATCGACTTACCGCT<br>CGAGCCTCC     |
| <p>MVTGYRLFEEILGSSGGGGSSGGGGSSGKSILDGLADTTFRITDLDLYVGSNDIQYEDIKGDMSKLGYPQKFLPTFRGSPFQEK<br/> TAGDNPQLVPADQVNITEFYNKSLSSFKENEEIQCGENFMDIECFMVLNPSQQLAIAVLSLTLGTFTVLENLLVLCVILHSRSLRCRPS<br/> YHFIGSLAVADLLGVSIFVYSFIDFHVHFRKDSRNVFLFKLGGVTASFTASVGSFLTAIDRYISIHRLAYKRIVTRPKAVVAFCLMWTIA<br/> IVIAVPLLLGWNCEKLSVCSDFPHIDETYL MFWIGVTSVLLLFIVYAYMYILWKAHSHAVRMIQRGTQKSIIHTSEDGKVQVTRPDQA<br/> RMDIRLAKTLVLILVLIICWGPELLAIMVYDVFVKMNKLIKTVFAFCSMLCLLNSTVNPPIYALRSKDLRHAFRSMFSPCEGTAQPLDNSM<br/> GSDCLHKKHANNAASVHRAAESCIKSTVKIAKVTMSVSTDSAEAL</p>                                                                                                                                                               |                                       |    |                                                  |                         |    |                                        |
| <b>CMV-3xHA-5-HT<sub>2A</sub>R-VN173</b>                                                                                                                                                                                                                                                                                                                                                                                                                                                                                                                                                                                                                                                                    | CMV-3xHA-5-HT <sub>2A</sub> R-SmBiT   | FW | CACAACATCGAGTAGCT<br>CGAGTCTAGAGGGCC             | pBiFC-<br>bJunVN173     | FW | GGAGGGTCGTCAGGTATGGT<br>GAGCAAGGGCC    |
|                                                                                                                                                                                                                                                                                                                                                                                                                                                                                                                                                                                                                                                                                                             |                                       | RV | GCCCTTGCTACCATAC<br>CTGACGACCTCC                 |                         | RV | CCCTCTAGACTCGAGCTACTC<br>GATGTTGTGGCC  |
| <p>MYPYDVPDYAYPYDVPDYAYPYDVPDYAD DILCEENTSLSTTNSLMQLNDDTRLYSNDFNSGEANTSDFNWTVDSENRTNLSCE<br/> GCLSPSCLSLHLHQEKNSWALLTAVVIILTIAGNILVIMAVSLEKKLNATNYFLMSLAIDMLLGLFVMPVSMILTILYGYRWPLPSKLCV<br/> WYLDVLFSTASIMHLCAISLDYVAIQNPIHHSRFNSRTKAFKIIAVWTISVGI SMPIPVFLQDDSKVFKEGSCLLADDFVLIGSFV<br/> FFIPLTIMVITYFLTIKSLQKEATLCVSDLGTRAKLASFSFLPQSSLSSEKLFQRSIHREPGSYTGRRTMQSISNEQKACKVLGIVFFLV</p>                                                                                                                                                                                                                                                                                                                   |                                       |    |                                                  |                         |    |                                        |

|                                                                                                                                                                                                                                                                                                                                                                                                                                                                                                                                                                                                                                                                                                                                                              |                                     |    |                                      |                 |    |                                        |
|--------------------------------------------------------------------------------------------------------------------------------------------------------------------------------------------------------------------------------------------------------------------------------------------------------------------------------------------------------------------------------------------------------------------------------------------------------------------------------------------------------------------------------------------------------------------------------------------------------------------------------------------------------------------------------------------------------------------------------------------------------------|-------------------------------------|----|--------------------------------------|-----------------|----|----------------------------------------|
| <p>VMWCPFFITNIMAVICKESCNEEDVIGALLNVFVWIGYLSAVNPLVYTLFNKTYRSAFSRYIQCQYKENKPKLQLILVNTIPALAYKSSQL<br/> QMGQKKNKQDAKTDDNDCSMVALGKQHSEEAASKDNSDGVNEKVCVGSSSGGGSSGGGSSGMVSKGEELFTGVVPIVVELDGD<br/> VNGHKFSVSGEGEGDATYGKLTLLKLICTTGKLPVPWPTLVTTGLYGLQCFARYPDHMKQHDFFKSAMPEGYVQERTIFFKDDGNYKT<br/> RAEVKFEEDTLVNRIELKGIDFKEDGNILGHKLEYNYNSHNVYITADKQKNGIKANFKIRHNIE</p>                                                                                                                                                                                                                                                                                                                                                                                              |                                     |    |                                      |                 |    |                                        |
| <b>CMV-3xHA-5-HT<sub>2A</sub>R-VC155</b>                                                                                                                                                                                                                                                                                                                                                                                                                                                                                                                                                                                                                                                                                                                     | CMV-3xHA-5-HT <sub>2A</sub> R-SmBiT | FW | GAGCTGTACAAGTAACT<br>CGAGTCTAGAGGGCC | pBiFC-bFosVC155 | FW | GGAGGGTCGTCAGGTGACAA<br>GCAGAAGAACGGC  |
|                                                                                                                                                                                                                                                                                                                                                                                                                                                                                                                                                                                                                                                                                                                                                              |                                     | RV | GTTCTTCTGCTTGTACACC<br>TGACGACCCTCC  |                 | RV | CCCTCTAGACTCGAGTTACTT<br>GTACAGCTCGTCC |
| <p>MYPYDVPDYAYPYDVPDYAYPYDVPDYAD<br/> DILCEENTSLSSTTNSLMQLNDDTRLYSNDFNNGEANTSDAFNWTVDSENRTNLSC<br/> EGLSPSCLSLHLQEKQNSWALLTAVVILTIAGNILVIMAVSLEKQLQATNYFLMSLAIADMLLGLFVMPVSMILTILYGYRWPLPSKLC<br/> AVIYLDVLFSTASIMHLCAISLDRIYVAIQNPPIHRSRNFRTKAFKIIAVWTISVGISMPVFLQDDSKVFKESCLLADDNFVLIGSFV<br/> SFFIPLTIMVITYFLTIKSLQKEATLCVSDLGTRAKLASFSFLPQSSLSSEKLFQRSIHREPGSYTGRRTMQSISNEQKACKVLGIVFFLV<br/> VMWCPFFITNIMAVICKESCNEEDVIGALLNVFVWIGYLSAVNPLVYTLFNKTYRSAFSRYIQCQYKENKPKLQLILVNTIPALAYKSSQL<br/> QMGQKKNKQDAKTDDNDCSMVALGKQHSEEAASKDNSDGVNEKVCVGSSSGGGSSGGGSSGDKQKNGIKANFKIRHNIEDGGV<br/> QLADHYQQNTPIGDGPVLLPDNHLYSYQSKLSKDPNEKRDHMLLEFVTAAGITLGMDELYK</p>                                                                                                |                                     |    |                                      |                 |    |                                        |
| <b>CMV-3xHA-CB<sub>1</sub>R-VN173</b>                                                                                                                                                                                                                                                                                                                                                                                                                                                                                                                                                                                                                                                                                                                        | CMV-3xHA-CB <sub>1</sub> R-SmBiT    | FW | CACAACATCGAGTAGCT<br>CGAGTCTAGAGGGCC | pBiFC-bJunVN173 | FW | GGAGGGTCGTCAGGTATGGT<br>GAGCAAGGGCC    |
|                                                                                                                                                                                                                                                                                                                                                                                                                                                                                                                                                                                                                                                                                                                                                              |                                     | RV | GCCCTTGCTCACCATAC<br>CTGACGACCCTCC   |                 | RV | CCCTCTAGACTCGAGCTACTC<br>GATGTTGTGGCC  |
| <p>MYPYDVPDYAYPYDVPDYAYPYDVPDYAD<br/> KSILDGLADTTFRITITDLLUYSNDIQYEDIKGDMSKLGYPQKFPPLTSFRGSPFQE<br/> KMTAGDNPQLVPADQVNIETEFYKSLSSFKENEENIQCGENFMIECFMVLNPSQQLAIAVLSLTLGTFTVLENLLVLCVILHSRSLRC<br/> RPSYHFIGSLAVADLLGSVIFVYSFIDFHVFRKDSRNVFLFKLGGVTASFTASVGSFLTAIDRYISHRPLAYKRIVTRPKAVVAFCLM<br/> WTIAIVIAVPLLLGWNCSEKLSVCSDFPHIDETYLMEWIGVTSVLLLFIVYAYMYILWKAHSHAVRMIQRGTQKSIHHTSEDKVQVTRP<br/> DQARMDIRLAKTLVLILVLIICWGPPLAIMVYDVFVGMNKLKIVFAFCMSMLCLLNSTVNPIIALRSKDLRHFASRMFSPCEGTAQPLD<br/> NSMGDSDCLHKKHANNAASVHRAAESCIKSTVKIAKVTMSVSTDSAEALGSSGGGSSGGGSSGMVSKGEELFTGVVPIVVELDGD<br/> VNGHKFSVSGEGEGDATYGKLTLLKLICTTGKLPVPWPTLVTTGLYGLQCFARYPDHMKQHDFFKSAMPEGYVQERTIFFKDDGNYKT<br/> RAEVKFEEDTLVNRIELKGIDFKEDGNILGHKLEYNYNSHNVYITADKQKNGIKANFKIRHNIE</p> |                                     |    |                                      |                 |    |                                        |
| <b>CMV-3xHA-CB<sub>1</sub>R-VC155</b>                                                                                                                                                                                                                                                                                                                                                                                                                                                                                                                                                                                                                                                                                                                        | CMV-3xHA-CB <sub>1</sub> R-SmBiT    | FW | GAGCTGTACAAGTAACT<br>CGAGTCTAGAGGGCC | pBiFC-bFosVC155 | FW | GGAGGGTCGTCAGGTGACAA<br>GCAGAAGAACGGC  |
|                                                                                                                                                                                                                                                                                                                                                                                                                                                                                                                                                                                                                                                                                                                                                              |                                     | RV | GTTCTTCTGCTTGTACACC<br>TGACGACCCTCC  |                 | RV | CCCTCTAGACTCGAGTTACTT<br>GTACAGCTCGTCC |
| <p>MYPYDVPDYAYPYDVPDYAYPYDVPDYAD<br/> KSILDGLADTTFRITITDLLUYSNDIQYEDIKGDMSKLGYPQKFPPLTSFRGSPFQE<br/> KMTAGDNPQLVPADQVNIETEFYKSLSSFKENEENIQCGENFMIECFMVLNPSQQLAIAVLSLTLGTFTVLENLLVLCVILHSRSLRC<br/> RPSYHFIGSLAVADLLGSVIFVYSFIDFHVFRKDSRNVFLFKLGGVTASFTASVGSFLTAIDRYISHRPLAYKRIVTRPKAVVAFCLM<br/> WTIAIVIAVPLLLGWNCSEKLSVCSDFPHIDETYLMEWIGVTSVLLLFIVYAYMYILWKAHSHAVRMIQRGTQKSIHHTSEDKVQVTRP<br/> DQARMDIRLAKTLVLILVLIICWGPPLAIMVYDVFVGMNKLKIVFAFCMSMLCLLNSTVNPIIALRSKDLRHFASRMFSPCEGTAQPLD<br/> NSMGDSDCLHKKHANNAASVHRAAESCIKSTVKIAKVTMSVSTDSAEALGSSGGGSSGGGSSGDKQKNGIKANFKIRHNIEDGGV<br/> QLADHYQQNTPIGDGPVLLPDNHLYSYQSKLSKDPNEKRDHMLLEFVTAAGITLGMDELYK</p>                                                                                                  |                                     |    |                                      |                 |    |                                        |

**Primer sequences for Gibson cloning.** The colour code corresponds to the translated sequences of: HA-Tag, 5-HT<sub>2A</sub>R/CB<sub>1</sub>R, G/S flexible Linker, LgBiT, SmBiT, VN173 Venus YFP and CV155 Venus YFP.
